## Left atrial strain reservoir in monitoring heart transplant paediatric patients

Borrelli N.<sup>1</sup>; Panebianco M.<sup>2</sup>; Di Salvo G.<sup>3</sup>; Alfieri S.<sup>2</sup>; De Angelis D.<sup>2</sup>; Chinali M.<sup>2</sup>; Amodeo A.<sup>2</sup>; Parisi F.<sup>2</sup>; Guccione P.<sup>2</sup>

<sup>1</sup>AORN Ospedali dei Colli - Monaldi Hospital, Adult Congenital Heart Disease Department, Naples, Italy

<sup>2</sup>BAMBINO GESU Paediatric Hospital, Rome, Italy

<sup>3</sup>University of Padova, Padua, Italy

**Funding Acknowledgements:** Type of funding sources: None.

**Background:** In heart transplant (HT) patients, high LV filling pressure is considered a marker of rejection and predictive of increased mortality.

**Purpose:** Our study aims to correlate echocardiographic parameters to left-ventricular end diastolic pressure (LVEDP) at cardiac catheterization in transplant recipients.

**Methods:** This was a retrospective study of 50 HT patients (54% male) who underwent heart transplantation in paediatric age (0-18 years-old). The echocardiographic evaluation was performed within three weeks from the left heart cardiac catheterization. From apical view, we measured: left atrial strain (LAS) indices [atrial contraction ( $\epsilon_{ac}$ ), LA filling (reservoir phase,  $\epsilon_{res}$ ), and LA passive emptying (conduit phase,  $\epsilon_{con}$ )], mitral doppler E/A, E/e', global longitudinal strain (LVGLS) and strain rate.

**Results:** Median LVEDP was 10 mmHg (IQR 8.25-12 mmHg) and had the best correlation with decreased  $\epsilon_{res}$  ( $r = -0.56$ ,  $p < 0.0001$ ). The other LAS indices and mitral E/e' correlated less strongly with LVEDP ( $\epsilon_{ac}$ :  $r = -0.42$ ,  $p = 0.004$ ;  $\epsilon_{con}$ :  $r = -0.55$ ,  $p = 0.0001$ ; E/e':  $r = 0.28$ ,  $p = 0.04$ ). E/A, LVGLS and LVGLS rate did not correlate with LVEDP. By ROC analysis,  $\epsilon_{res} \leq 16.3\%$  was predictive of elevated LVEDP with a good sensitivity (86%) and moderate specificity (57%). A multivariate analysis produced  $\epsilon_{res}$  as the best predictor ( $p = 0.0001$ ) for high LVEDP.

**Conclusions:** Non-invasive  $\epsilon_{res}$  seems to be a good surrogate of invasive LVEDP. Monitoring  $\epsilon_{res}$  may be of value in HT patients to survey for rejection and graft dysfunction.

Abstract Figure. Scatter plots LVEDP- $\epsilon_{res}$  correlation

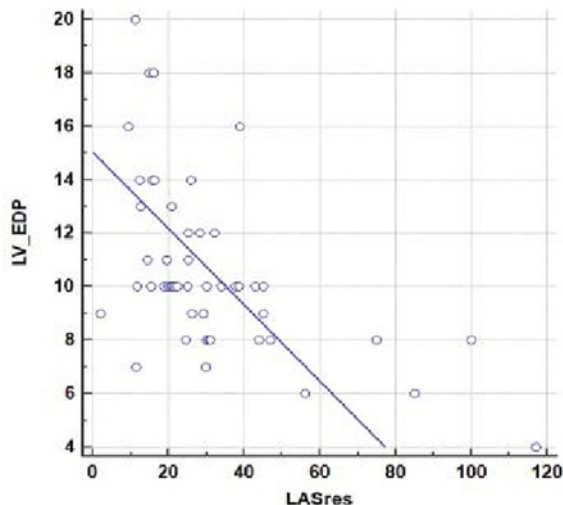

Source: http://academic.oup.com/ehjcimaging/article-pdf/22/Supplement_1/jeaa356.147/36214629/jeaa356.147.pdf
